# Supplementary figures and images for: Transposable Elements Shape the Genome Diversity and the Evolution of Noctuidae Species
Source: MDPI journal article supplement (doi:10.3390/genes14061244), 2023-06-10

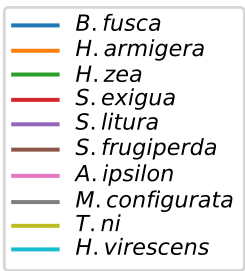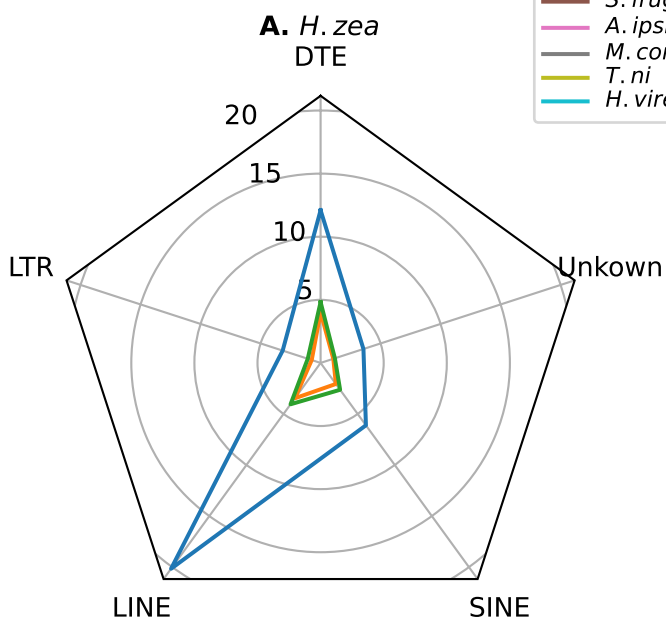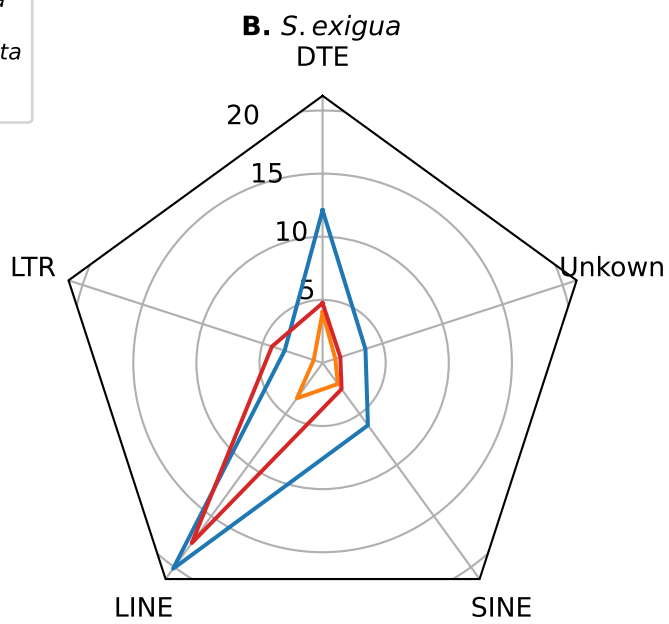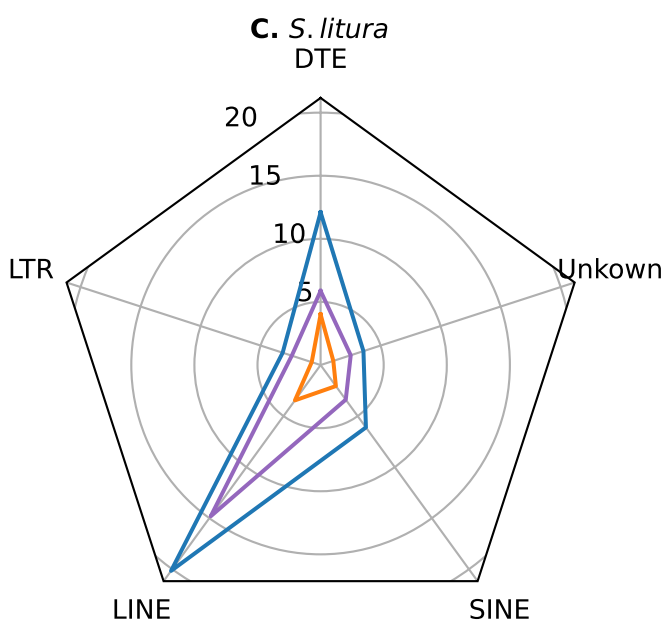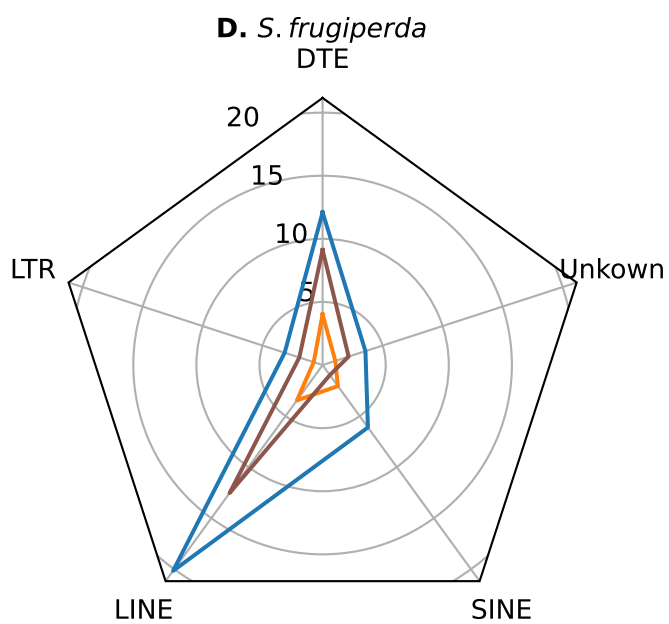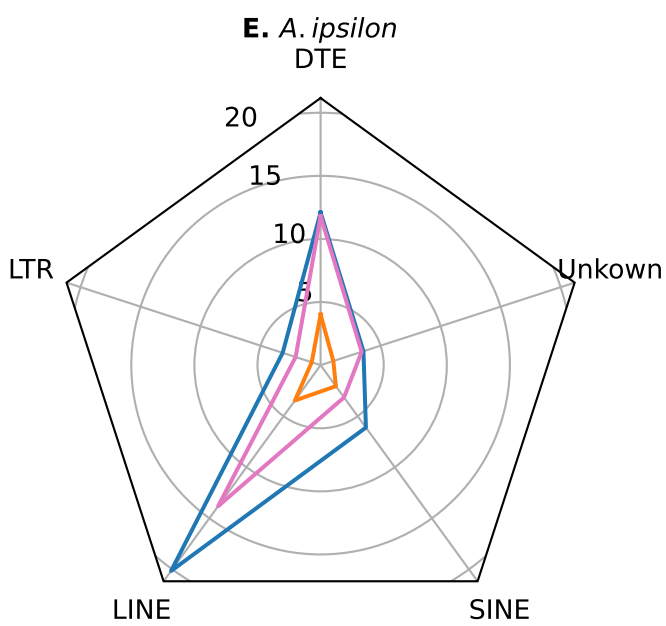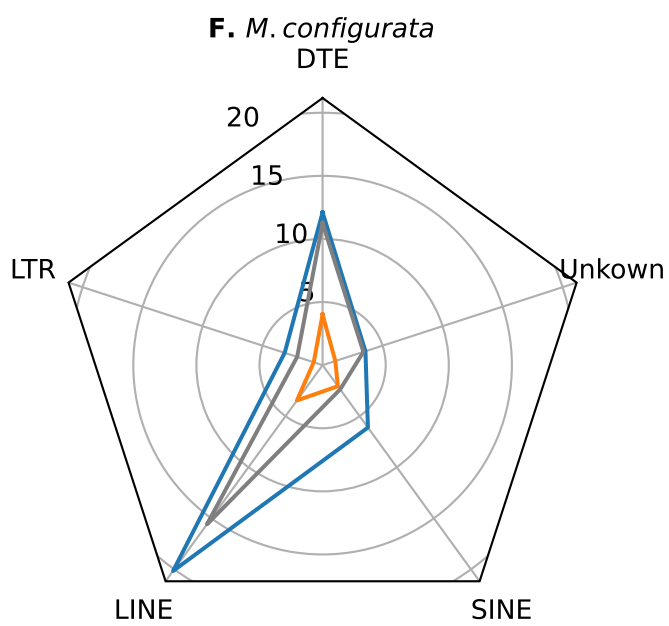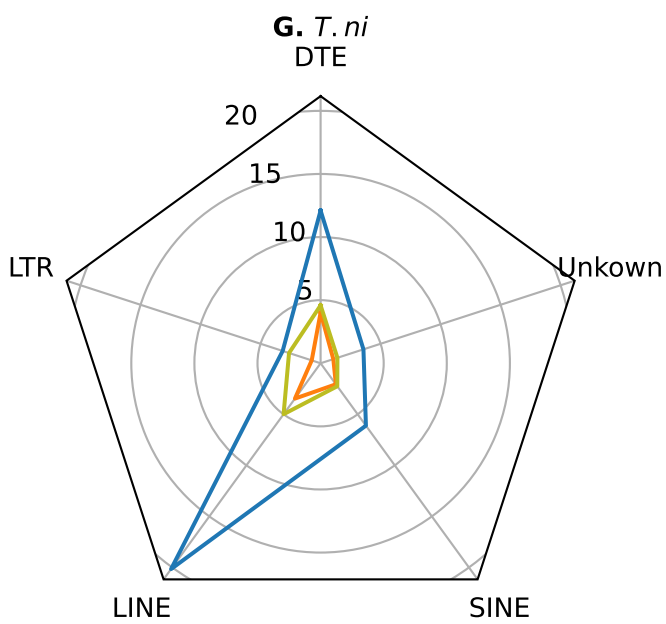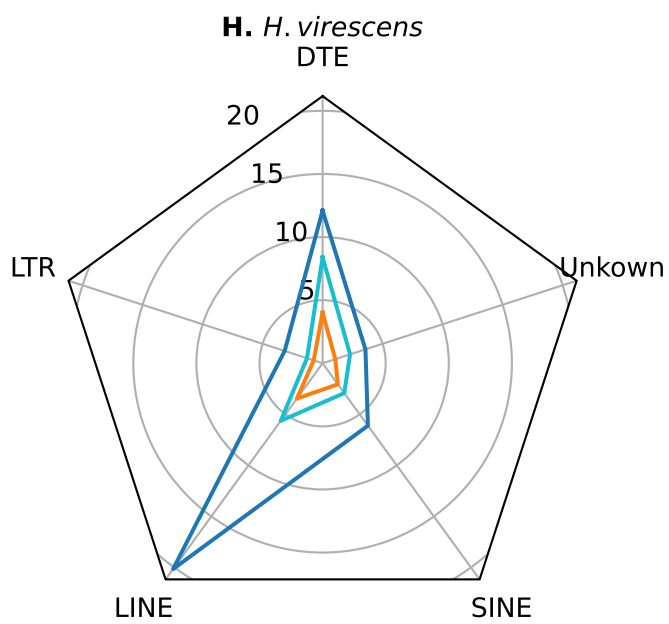

Supplement: s1 [file s1]
